# Supplementary material
Source: publisher figshare collection journal article supplement (https://acs.figshare.com/ndownloader/files/20157053)
Supplement: Supplementary file 1 [file 20157053]

## Supporting Information

# Continuous production of the nanoscale liposome in a double flow-focusing microfluidics device

Halimeh Aghaei<sup>1</sup>, Ali Reza Solaimany Nazar<sup>\*2</sup>

<sup>1,2</sup>Department of Chemical Engineering, University of Isfahan, Isfahan, Iran

\*E-mail: [asolaimany@eng.ui.ac.ir](mailto:asolaimany@eng.ui.ac.ir),

Tel: +983137934027

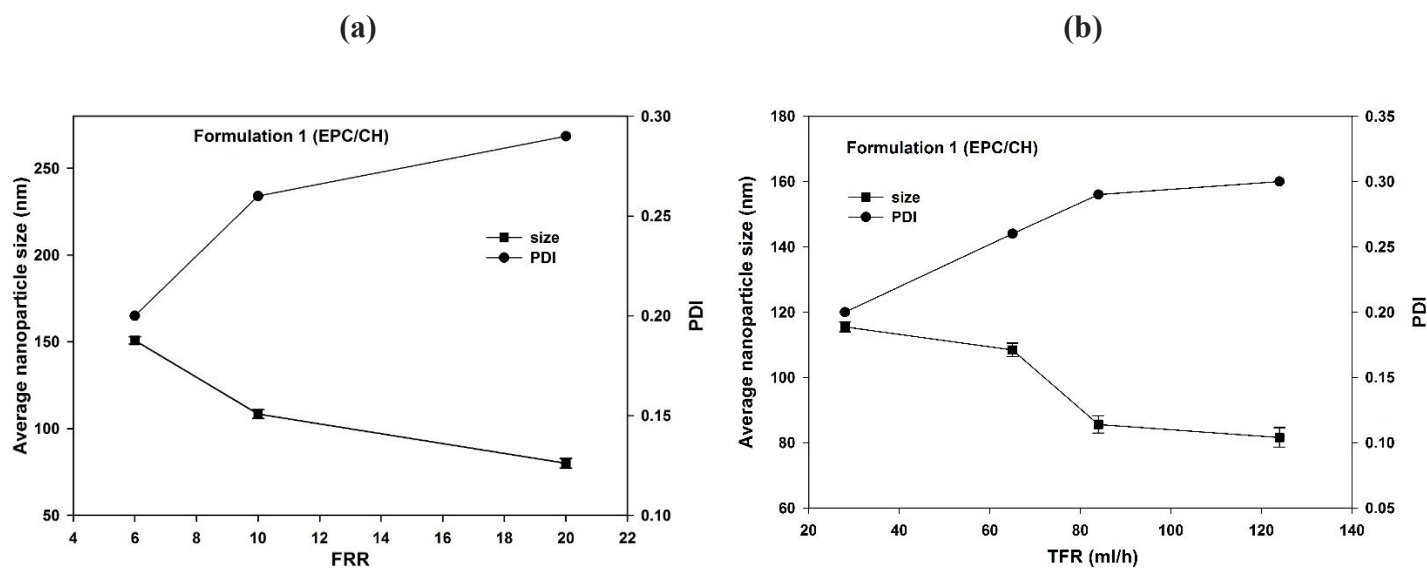

**Figure S1.** (a) Size variation of formulation 1 (EPC/CH, 60:40) with FRR at TFR of 65 ml h<sup>-1</sup>, (b) Size variation of formulation 1 with TFR at FRR of 10

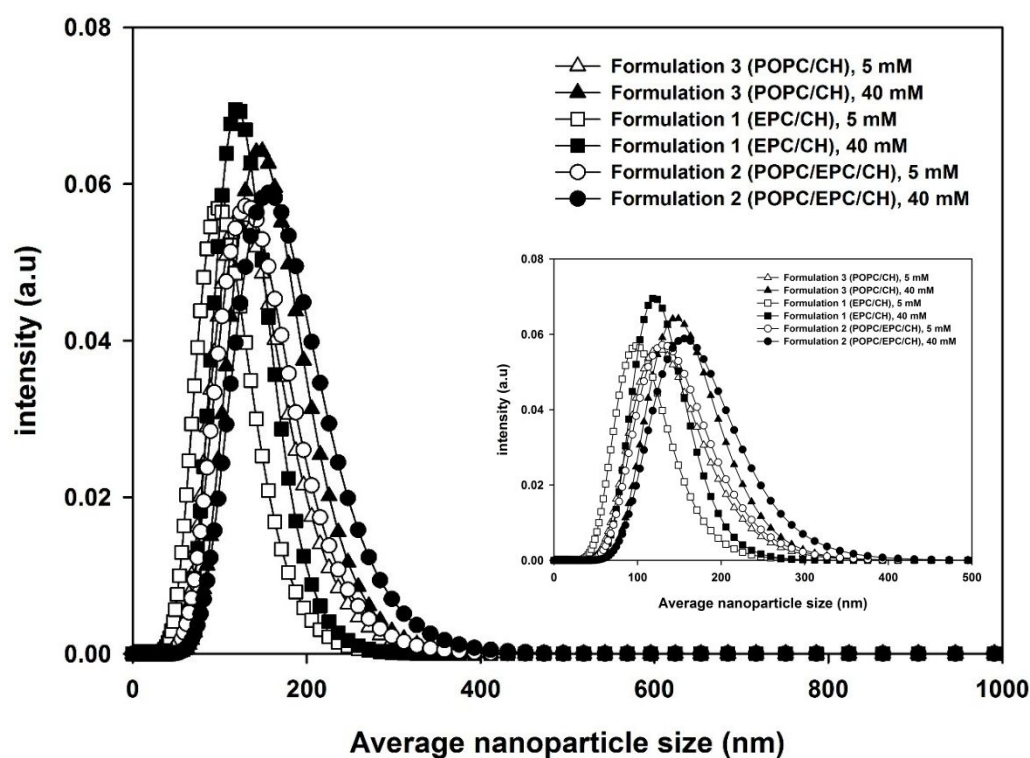

**Figure S2.** Size distributions of the formulations 1 (EPC/CH: 60:40), 2 (POPC/EPC/CH: 30:30:40) and 3 (POPC/CH: 60:40) for the lipid concentrations of 5 and 40 mM at FRR of 10.

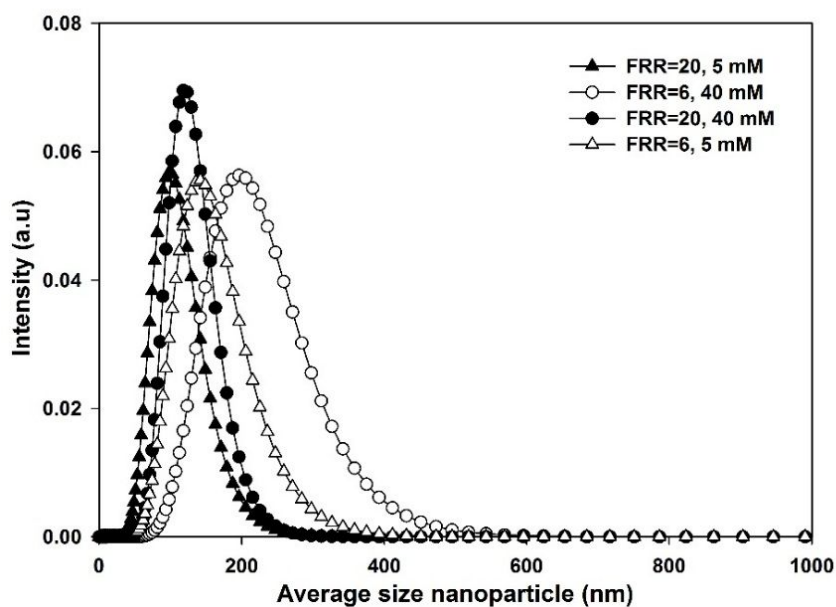

**Figure S3.** The liposome size distribution for formulation 1 (EPC/CH) at the lipid concentrations of 5 and 40 mM at the FRRs of 6 and 20.
